# Supplementary material for: Acaricide Resistance Development in Rhipicephalus (Boophilus) Microplus (Acari: Ixodidae) Populations against Amitraz and Deltamethrin on Communal Farms of the King Sabata Dalindyebo Municipality, South Africa
Source: Preprints.org preprint supplement (doi:10.20944/preprints202305.1562.v1), 2023-05-23
Supplement: Supplementary file 1 [file supplementary]

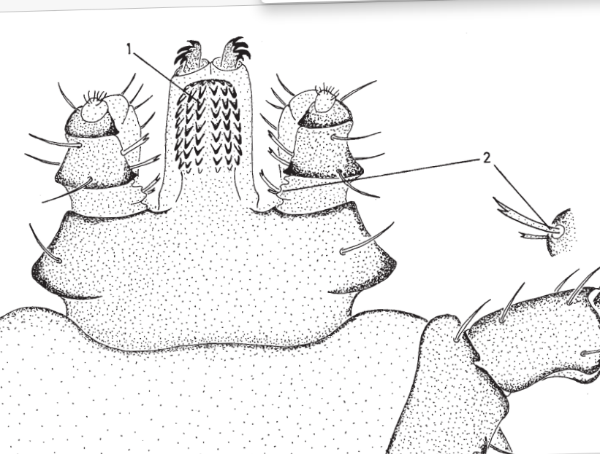

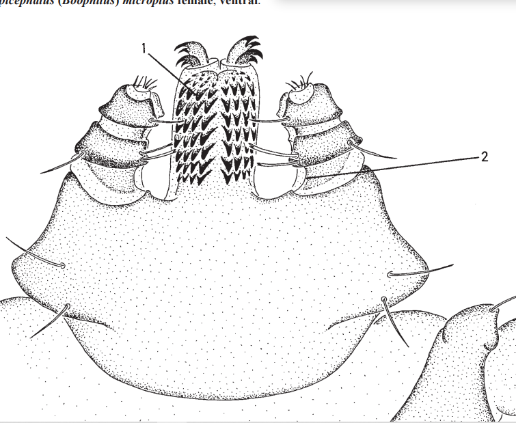


**Figure S1:** Morphological keys used in the identification of *Rhipicephalus* *Boophilus* species, Walker et al. (2003).
